# Supplementary material for: RNAPII Degradation Factor Def1 Is Required for Development, Stress Response, and Full Virulence of Magnaporthe oryzae
Source: MDPI journal article supplement (doi:10.3390/jof9040467), 2023-04-13
Supplement: s1 [file s1]

Article

# RNAPII Degradation Factor Def1 Is Required for Development, Stress Response, and Full Virulence of *Magnaporthe oryzae*

Xinrong Zhang <sup>1,2</sup>, Dong Li <sup>1</sup>, Jun Zhu <sup>2</sup>, Jing Zheng <sup>2</sup>, Hongye Li <sup>2</sup>, Qixuan He <sup>1</sup>, Jun Peng <sup>3</sup>, Shen Chen <sup>4</sup>, Xiao-Lin Chen <sup>2,\*</sup> and Weixiang Wang <sup>1,\*</sup>

<sup>1</sup> Beijing Key Laboratory of New Technology in Agricultural Application, National Demonstration Center for Experimental Plant Production Education, College of Plant Science and Technology, Beijing University of Agriculture, Beijing 102206, China

<sup>2</sup> State Key Laboratory of Agricultural Microbiology, Provincial Key Laboratory of Plant Pathology of Hubei Province, College of Plant Science and Technology, Huazhong Agricultural University, Wuhan 430070, China

<sup>3</sup> Environment and Plant Protection Institute, Chinese Academy of Tropical Agricultural Sciences, Haikou 571101, China

<sup>4</sup> Guangdong Provincial Key Laboratory of High Technology for Plant Protection, Plant Protection Research Institute, Guangdong Academy of Agricultural Sciences, Guangzhou 510640, China

\* Correspondence: chenxiaolin@mail.hzau.edu.cn (X.-L.C.); wangweixiang@buaa.edu.cn (W.W.)

**Supplementary material** – All relevant material referred to, but not included in the main text are included in the following supplementary section. All experimental raw data is available upon request from Prof Xiao-Lin Chen at the College of Plant Science & Technology, Huazhong Agricultural University.

**Citation:** Zhang, X.; Li, D.; Zhu, J.; Zheng, J.; Li, H.; He, Q.; Peng, J.; Chen, S.; Chen, X.-L.; Wang, W. RNAPII Degradation Factor Def1 Is Required for Development, Stress Response, and Full Virulence of *Magnaporthe oryzae*. *J. Fungi* **2023**, *9*, 467. <https://doi.org/10.3390/jof9040467>

Academic Editor: Ulrich Kück

Received: 15 February 2023

Revised: 6 April 2023

Accepted: 11 April 2023

Published: 13 April 2023

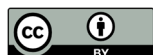

**Copyright:** © 2023 by the authors. Submitted for possible open access publication under the terms and conditions of the Creative Commons Attribution (CC BY) license (<https://creativecommons.org/licenses/by/4.0/>).

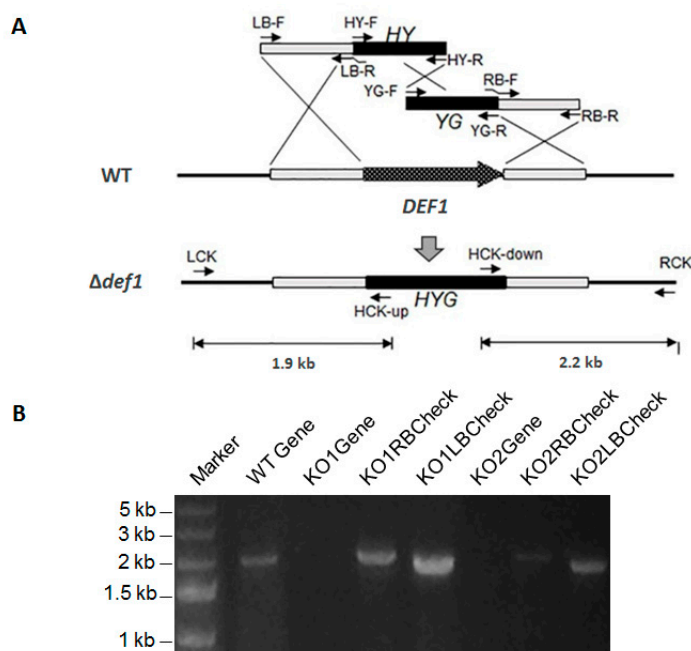

**Figure S1.** Targeted deletion of *Def1*. (A) Diagram of the deletion strategy of *Def1*. (B) Identification of *Def1* deletion mutants by PCR. KO1 and KO2 are two independent strains.

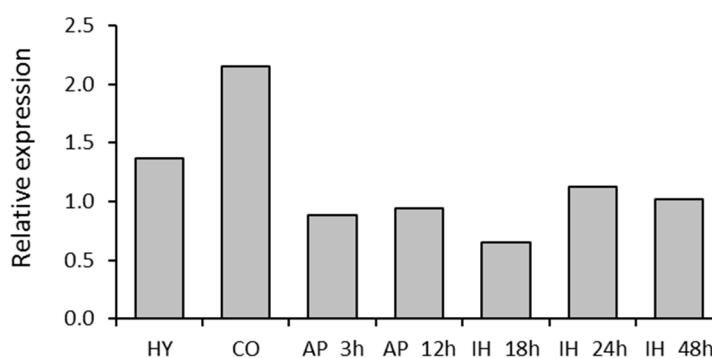

**Figure S2.** Relative expression level of *Def1* gene in different development stages of *M. oryzae*. HY, Vegetative hyphae; CO, Conidia; AP\_3h, Appressoria at 3 hpi; AP\_12h, Appressoria at 12 hpi; IH\_18h, Infection hyphae at 18 hpi; IH\_24h, Infection hyphae at 24 hpi; IH\_48h, Infection hyphae at 48 hpi.

**Table S1. Fungal strains used in this study.**

| Strains                          | Discriptions                                            | References |
|----------------------------------|---------------------------------------------------------|------------|
| WT                               | P131, a wild-type isolate of <i>M. oryzae</i>           | This study |
| DEF1KO1                          | One independent <i>DEF1</i> deletion mutant of P131     | This study |
| DEF1KO2                          | Another independent <i>DEF1</i> deletion mutant of P131 | This study |
| cDEF1                            | Complementary strain of DEF1KO1                         | This study |
| $\Delta def1/DEF1^{S232A}$ :Flag | O-GlcNAc site mutant strains of DEF1                    | This study |
| $\Delta def1/DEF1$ :Flag         | DEF1-Flag fusion expression strains                     | This study |

**Table S2. Primers used in this study.**

| Primers     | Sequences (5'–3')                       |
|-------------|-----------------------------------------|
| gene-up     | CCGAGACTATCGAGCCACTC                    |
| gene-down   | CACCAAAACCCTGGTTACCA                    |
| LCK         | TGCCGGTCTCTTTGATACAT                    |
| HCK-up      | GACAGACGTCGCGGTGAGTT                    |
| HCK-down    | TCTGGACCGATGGCTGTGTAG                   |
| RCK         | CGAAGTCGGGTGTAGGCTCT                    |
| pKN-F       | GGCGAATTGGGTACCAGTTGTTGCGAGTCTTGAGG     |
| pKN-R       | GTGGATCCCGAATTCGGCCTAATGGTAGTTGTTGC     |
| pKNFlag-F   | AATCTTCAAACCCGGGATGTCTACTGAGGCACAAACCCG |
| pKNFlag-R   | ACGGTATCGATAAGCTTATGGTAGTTGTTGCCCAAC    |
| DEF1-S232AF | GTCCTGCTCCTGCCAAACCCGCCGTC              |
| DEF1-S232AR | GACGGCGGGTTTGGCAGGAGCAGGAGC             |
